# Supplementary material for: Complement C4 Copy Number Variation is Linked to SSA/Ro and SSB/La Autoantibodies in Systemic Inflammatory Autoimmune Diseases
Source: PubMed Central journal article supplement — Arthritis Rheumatol. 2022 Jun 27;74(8):1440–50. doi: 10.1002/art.42122 (PMC9543510; doi:10.1002/art.42122), 2022-06-27
Supplement: ART-74-1440-s001.pdf [file ART-74-1440-s001.pdf]

#### **4.3. Transmission of HLA alleles from parents to offspring in WGS trios**

As additional approach to validate the tool xHLA (18) for calling *HLA* alleles, we assessed whether *HLA* alleles called in offsprings could be traced back to their parents by using WGS data from 75 parent-offspring trios in which the offspring had been diagnosed with SLE (15). Briefly, read mapped to chr6:29000000-34000000 (GRCh37) and unmapped reads were remapped to GRCh38, duplicate reads discarded, and 2-field (i.e. 4-digit) alleles were called for *HLA-A*, *-B*, *-C*, *-DPBI*, *-DQBI* and *-DRBI* using the tool xHLA.

We next evaluated whether the alleles called among the 75 offsprings could be traced back to the parents for each of the 6 *HLA* genes (900 *HLA* alleles in total). The correct transmission pattern was observed for 99.6% of all alleles with 4 wrong allele calls in either the offspring or one of the parents (*HLA-A* for one trio, *-DQBI* for one trio, and *-DPBI* for two trios), therefore showing a high agreement for *HLA* calls.

#### **4.4. Comparison of HLA calls from WGS vs. targeted sequencing data**

We next compared 2-field *HLA* calls for overlapping samples with both targeted sequencing data and WGS data (n = 45 SLE patients). For the 6 *HLA* genes, allelic match between calls from targeted sequencing data and WGS data was seen for 95.0% of all genes, and for individual genes, an allelic match of 97.8% (*HLA-A*), 96.7% (*-B*), 84.8% (*-C*), 94.6% (*-DPBI*), 98.8% (*-DQBI*), and 97.8% (*-DRBI*) was seen.

### **5. C4b deposition on heat-aggregated human IgG**

MaxiSorp plates were coated overnight at 4°C with 5 µg/ml heat-aggregated IgG in phosphate buffered saline (PBS) pH 7.4. PBS with 1% bovine serum albumin (BSA) was coated as control. Plates were blocked for 2 hours at room temperature with 1% BSA in PBS. Sera were diluted in GVB++ buffer (2.5 mM veronal buffer [pH 7.3], 150 mM NaCl, 0.1% gelatin, 1 mM MgCl<sub>2</sub>, 0.15 mM CaCl<sub>2</sub>) and incubated for 20 min. at room temperature. Deposited C4b was detected with a polyclonal rabbit anti-human C4c antibody (Dako cat. Q0369) followed by HRP-conjugated polyclonal swine anti-rabbit antibody (Dako cat. P0399). Plates were developed using TMB one (Kementec), and absorbance was measured at 450 nm with 620 nm as reference wavelength using a Cytation-5 multi-mode reader (BioTek). Unspecific binding to 1% BSA resulted in Abs<sub>450nm-620nm</sub> < 0.02.

### **6. Consortia**

#### **6.1. The DISSECT consortium**

Lars Rönnblom (Department of Medical Sciences, Rheumatology, Uppsala University, Uppsala, Sweden), Gunnel Nordmark (Department of Medical Sciences, Rheumatology, Uppsala University, Uppsala, Sweden), Ingrid E. Lundberg (Division of Rheumatology, Department of Medicine Solna, Karolinska Institutet, Karolinska University Hospital, Stockholm, Sweden), Johanna K. Sandling (Department of Medical Sciences, Rheumatology, Uppsala University, Uppsala, Sweden), Pascal Pucholt (Department of Medical Sciences, Rheumatology, Uppsala University, Sweden), Lina Hultin Rosenberg (Science for Life Laboratory, Department of Medical Biochemistry and Microbiology, Uppsala University, Uppsala, Sweden), Sergey V. Kozyrev (Science for Life Laboratory, Department of Medical Biochemistry and Microbiology, Uppsala University, Uppsala, Sweden), Maija-Leena Eloranta (Department of Medical Sciences, Rheumatology, Uppsala University, Uppsala, Sweden), Andrei Alexsson (Department of Medical Sciences, Rheumatology, Uppsala University, Uppsala, Sweden), Matteo Bianchi (Science for Life Laboratory, Department of Medical Biochemistry and Microbiology, Uppsala University, Uppsala, Sweden), Christine Bengtsson (Department of

Public Health and Clinical Medicine/Rheumatology, Umeå University, Umeå, Sweden), Roland Jonsson (Broegelmann Research Laboratory, Department of Clinical Science, University of Bergen, Bergen, Norway), Roald Omdal (Department of Internal Medicine, Stavanger University Hospital, Stavanger, Norway), Øyvind Molberg (Department of Rheumatology, Oslo University Hospital, Oslo, Norway), Ann-Christine Syvänen (Department of Medical Sciences, Molecular Medicine and Science for Life Laboratory, Uppsala University, Uppsala, Sweden), Andreas Jönsen (Department of Clinical Sciences Lund, Rheumatology, Lund University, Skåne University Hospital, Lund, Sweden), Iva Gunnarsson (Division of Rheumatology, Department of Medicine Solna, Karolinska Institutet, Karolinska University Hospital, Stockholm, Sweden), Elisabet Svenungsson (Division of Rheumatology, Department of Medicine Solna, Karolinska Institutet, Karolinska University Hospital, Stockholm, Sweden), Solbritt Rantapää-Dahlqvist (Department of Public Health and Clinical Medicine/Rheumatology, Umeå University, Umeå, Sweden), Anders A. Bengtsson (Department of Clinical Sciences Lund, Rheumatology, Lund University, Skåne University Hospital, Lund, Sweden), Christopher Sjöwall (Department of Biomedical and Clinical Sciences, Division of Inflammation and Infection, Linköping University, Linköping, Sweden), Dag Leonard (Department of Medical Sciences, Rheumatology, Uppsala University, Uppsala, Sweden), Kerstin Lindblad-Toh (Science for Life Laboratory, Department of Medical Biochemistry and Microbiology, Uppsala University, Uppsala, Sweden and Broad Institute of MIT and Harvard, Cambridge, MA, USA), Jonas Carlsson Almlöf (Department of Medical Sciences, Molecular Medicine and Science for Life Laboratory, Uppsala University, Uppsala, Sweden), Niklas Hagberg (Department of Medical Sciences, Rheumatology, Uppsala University, Uppsala, Sweden), Jennifer R. S. Meadows (Science for Life Laboratory, Department of Medical Biochemistry and Microbiology, Uppsala University, Uppsala, Sweden), Jessika Nordin (Science for Life Laboratory, Department of Medical Biochemistry and Microbiology, Uppsala University, Uppsala, Sweden), Marie Wahren-Herlenius (Division of Rheumatology, Department of Medicine Solna, Karolinska Institutet, Karolinska University Hospital, Stockholm, Sweden and Broegelmann Research Laboratory, Department of Clinical Science, University of Bergen, Norway), Sule Yavuz (Department of Medical Sciences, Rheumatology, Uppsala University, Uppsala, Sweden), Anna Tjärnlund (Department of Medicine, Rheumatology unit, Karolinska Institutet, Stockholm, Sweden), Antonella Notarnicola (Division of Rheumatology, Department of Medicine Solna, Karolinska Institutet, Karolinska University Hospital, Stockholm, Sweden), Daniel Hammenfors (Department of Rheumatology, Haukeland University Hospital, Bergen, Norway), Elke Theander (Department of Rheumatology, Skåne University Hospital Malmö/Lund University, Lund, Sweden), Eva Baecklund (Department of Medical Sciences, Rheumatology, Uppsala University, Uppsala, Sweden), Guðný Ella Thorlacius (Department of Medicine, Unit for Experimental Rheumatology, Karolinska Institutet, Stockholm, Sweden), Hector Chinoy (Rheumatology Dept, Salford Royal NHS Foundation Trust, Manchester Academic Health Science Centre, Salford, UK and National Institute for Health Research Manchester Biomedical Research Centre, Manchester University NHS Foundation Trust, The University of Manchester, Manchester, UK), Helena Andersson (Department of Rheumatology, Oslo University Hospital, Oslo, Norway), Helena Enocsson (Department of Biomedical and Clinical Sciences, Division of Inflammation and Infection, Linköping University, Linköping, Sweden), Helena Forsblad-d'Elia (Department of Rheumatology and Inflammation Research, Sahlgrenska Academy at University of Gothenburg, Gothenburg, Sweden), Janine Lamb (Centre for Integrated Genomic Medical Research (CIGMR) , University of Manchester, Manchester, UK), Johan G. Brun (Department of Rheumatology, Haukeland University Hospital, University of Bergen, Bergen, Norway), Jonas Wetterö (Department of Biomedical and Clinical Sciences, Division of Inflammation and Infection, Linköping University, Linköping, Sweden), Jorge I. Ramírez Sepúlveda

(Department of Medicine, Unit for Experimental Rheumatology, Karolinska Institutet, Stockholm, Sweden), Juliana Imgenberg-Kreuz (Department of Medical Sciences, Rheumatology, Uppsala University, Uppsala, Sweden), Karin Hjorton (Department of Medical Sciences, Rheumatology, Uppsala University, Uppsala, Sweden), Karl A. Brokstad (Broegelmann Research Laboratory, Department of Clinical Science, University of Bergen, Bergen, Norway), Kathrine Skarstein (The Gade Laboratory for Pathology, Department of Clinical Medicine, University of Bergen, Norway), Katrine Brække Norheim (Department of Internal Medicine, Stavanger University Hospital, Stavanger, Norway), Lilian Vasaitis (Department of Medical Sciences, Rheumatology, Uppsala University, Uppsala, Sweden), Louise Pyndt Diederichsen (Center for Rheumatology and Spine Disease, Copenhagen University Hospital, Rigshospitalet, Copenhagen, Denmark and Department of Rheumatology, Odense University Hospital, Odense, Denmark), Malin V. Jonsson (Section for Oral and Maxillofacial Radiology, Department of Clinical Dentistry, University of Bergen, Bergen, Norway), Marika Kvarnström (Division of Rheumatology, Department of Medicine Solna, Karolinska Institutet, Karolinska University Hospital, Stockholm, Sweden and Academic Specialist Center, Center for Rheumatology, Stockholm Health Services, Region Stockholm, Stockholm, Sweden), Maryam Dastmalchi (Center for Molecular Medicine, Karolinska Institutet, Stockholm, Sweden), Per Eriksson (Department of Biomedical and Clinical Sciences, Division of Inflammation and Infection, Linköping University, Linköping, Sweden), Robert G. Cooper (Institute of Ageing and Chronic Disease, University of Liverpool, Liverpool, UK), Sara Magnusson Bucher (Department of Rheumatology, Faculty of Medicine and Health, Örebro University, Örebro, Sweden), Silke Appel (Broegelmann Research Laboratory, Department of Clinical Science, University of Bergen, Bergen, Norway), Simon Rothwell (Institute of Inflammation and Repair, University of Manchester, Manchester, UK), Svein Joar Johnsen (Department of Internal Medicine, Stavanger University Hospital, Stavanger, Norway), Thomas Mandl (Department of Clinical Sciences Malmö, Division of Rheumatology, Lund University, Malmö, Sweden), Lara Adnan Aqrabi (Department of Oral Surgery and Oral Medicine, Institute of Clinical Odontology, University of Oslo, Oslo, Norway and Department of Health Sciences, Kristiania University College, Oslo, Norway), Janicke Liaaen Jensen (Department of Oral Surgery and Oral Medicine, Institute of Clinical Odontology, University of Oslo, Oslo, Norway), Øyvind Palm (Department of Rheumatology, Oslo University Hospital, Oslo, Norway), Maria Liden (Department of Medical Sciences, Rheumatology, Uppsala University, Uppsala, Sweden), Thomas Skogh (Department of Biomedical and Clinical Sciences, Division of Inflammation and Infection, Linköping University, Linköping, Sweden), Balsam Hanna (Department of Rheumatology, Sahlgrenska University Hospital, Gothenburg, Sweden), Christina Ståhl Hallengren (Rheumatology Unit, Helsingborg Hospital, Helsingborg, Sweden), Helena Hellström (Department of Rheumatology, Falu Hospital, Falun, Sweden), Åsa Häggström (Rheumatology clinic, Kalmar Hospital, Kalmar, Sweden), Aladdin Mohammad (Department of Clinical Sciences Lund, Rheumatology, Lund University, Skåne University Hospital, Lund, Sweden), Tomas Husmark (Department of Rheumatology, Falu Hospital, Falun, Sweden), Anna Svärd (Centre of Clinical Research Dalarna, Uppsala University, Falun, Sweden), Awat Jalal (Department of Rheumatology, Örebro University, Örebro, Sweden).

Hector Chinoy is supported by the National Institute for Health Research Biomedical Research Centre Funding Scheme. The views expressed in this publication are those of the authors and not necessarily those of the NHS, the National Institute for Health Research or the Department of Health

## 6.2. The ImmunoArray development consortium

Kerstin Lindblad-Toh (Science for Life Laboratory, Department of Medical Biochemistry and Microbiology, Uppsala University, Uppsala, Sweden and Broad Institute of MIT and Harvard, Cambridge, MA, USA), Gerli Rosengren Pielberg (Science for Life Laboratory, Department of Medical Biochemistry and Microbiology, Uppsala University, Uppsala, Sweden), Anna Lobell (Office for Medicine and Pharmacy, Uppsala University, Uppsala, Sweden), Åsa Karlsson (Science for Life Laboratory, Department of Medical Biochemistry and Microbiology, Uppsala University, Uppsala, Sweden), Eva Murén (Science for Life Laboratory, Department of Medical Biochemistry and Microbiology, Uppsala University, Uppsala, Sweden), Göran Andersson (Department of Animal Breeding and Genetics, Swedish University of Agricultural Sciences, Uppsala, Sweden), Kerstin M. Ahlgren (Department of Surgical Sciences, Uppsala University, Uppsala, Sweden), Lars Rönnblom (Department of Medical Sciences, Rheumatology, Uppsala University, Uppsala, Sweden), Maija-Leena Eloranta (Department of Medical Sciences, Rheumatology, Uppsala University, Uppsala, Sweden), Nils Landegren (Department of Medical Biochemistry and Microbiology, Uppsala University, Uppsala, Sweden and Centre for Molecular Medicine, Department of Medicine (Solna), Karolinska Institute, Stockholm, Sweden), Olle Kämpe (Department of Medicine (Solna), Center for Molecular Medicine, Karolinska Institutet, Stockholm, Sweden, Department of Endocrinology, Metabolism and Diabetes Karolinska University Hospital, Stockholm, Sweden and KG Jebsen Center for autoimmune diseases, University of Bergen, Norway), Peter Söderkvist (Division of Cell Biology, Department of Biomedical and Clinical Sciences, Linköping University, Linköping, Sweden).

## 7. References

1. Eriksson D, Bianchi M, Landegren N, Nordin J, Dalin F, Mathioudaki A, et al. Extended exome sequencing identifies BACH2 as a novel major risk locus for Addison's disease. *Journal of Internal Medicine*. 2016;280(6):595-608.
2. Thorlacius GE, Hultin-Rosenberg L, Sandling JK, Bianchi M, Imgenberg-Kreuz J, Pucholt P, et al. Genetic and clinical basis for two distinct subtypes of primary Sjögren's syndrome. *Rheumatology*. 2021;60(2):837-48.
3. Sandling JK, Pucholt P, Hultin Rosenberg L, Farias FHG, Kozyrev SV, Eloranta M-L, et al. Molecular pathways in patients with systemic lupus erythematosus revealed by gene-centred DNA sequencing. *Annals of the Rheumatic Diseases*. 2021;80(1):109-17.
4. Bianchi M, Kozyrev SV, Notarnicola A, Hultin Rosenberg L, Karlsson Å, Pucholt P, et al. Contribution of rare genetic variation to disease susceptibility in a large Scandinavian myositis cohort. *Arthritis & Rheumatology*. 2021.
5. Wang C, Zhan X, Bragg-Gresham J, Kang HM, Stambolian D, Chew EY, et al. Ancestry estimation and control of population stratification for sequence-based association studies. *Nature Genetics*. 2014;46(4):409-15.
6. Wang C, Zhan X, Liang L, Abecasis Gonçalo R, Lin X. Improved Ancestry Estimation for both Genotyping and Sequencing Data using Projection Procrustes Analysis and Genotype Imputation. *The American Journal of Human Genetics*. 2015;96(6):926-37.
7. Manichaikul A, Mychaleckyj JC, Rich SS, Daly K, Sale M, Chen W-M. Robust relationship inference in genome-wide association studies. *Bioinformatics*. 2010;26(22):2867-73.
8. Chang CC, Chow CC, Tellier LC, Vattikuti S, Purcell SM, Lee JJ. Second-generation PLINK: rising to the challenge of larger and richer datasets. *GigaScience*. 2015;4(1):7.
9. Yu CY. The complete exon-intron structure of a human complement component C4A gene. DNA sequences, polymorphism, and linkage to the 21-hydroxylase gene. *The Journal of Immunology*. 1991;146(3):1057.
10. Yu CY, Belt KT, Giles CM, Campbell RD, Porter RR. Structural basis of the polymorphism of human complement components C4A and C4B: gene size, reactivity and antigenicity. *The EMBO journal*. 1986;5(11):2873-81.
11. Dangel AW, Mendoza AR, Menachery CD, Baker BJ, Daniel CM, Carroll MC, et al. The dichotomous size variation of human complement C4 genes is mediated by a novel family of endogenous retroviruses, which also establishes species-specific genomic patterns among Old World primates. *Immunogenetics*. 1994;40(6):425-36.
12. Wu Y, Lundstrom E, Liu C-C, Yang Y, Gunnarsson I, Svenungsson E, et al. Low copy-number of complement C4A, the presence of HLA-DR3, and the presence of HLA-DR2 are independent and additive risk factors for human systemic lupus erythematosus (SLE). *The Journal of Immunology*. 2010;184(1 Supplement):93.13.
13. Wu YL, Savelli SL, Yang Y, Zhou B, Rovin BH, Birmingham DJ, et al. Sensitive and Specific Real-Time Polymerase Chain Reaction Assays to Accurately Determine Copy Number Variations (CNVs) of Human Complement C4A, C4B, C4-Long, C4-Short, and RCCX Modules: Elucidation of C4 CNVs in 50 Consanguineous Subjects with Defined HLA Genotypes. *The Journal of Immunology*. 2007;179(5):3012.
14. Sekar A, Bialas AR, de Rivera H, Davis A, Hammond TR, Kamitaki N, et al. Schizophrenia risk from complex variation of complement component 4. *Nature*. 2016;530(7589):177-83.
