# Supplementary material for: Complement C4 Copy Number Variation is Linked to SSA/Ro and SSB/La Autoantibodies in Systemic Inflammatory Autoimmune Diseases
Source: PubMed Central journal article supplement — Arthritis Rheumatol. 2022 Jun 27;74(8):1440–50. doi: 10.1002/art.42122 (PMC9543510; doi:10.1002/art.42122), 2022-06-27
Supplement: ART-74-1440-s002.pdf [file ART-74-1440-s002.pdf]

# Supplementary Figure 1

**A**

**Association of *C4* copy number with disease**  
vs. healthy controls; for each decrease in *C4* copy number

|                 | <i>C4</i> copy number |         | <i>n</i> <sub>patients</sub> | <i>n</i> <sub>controls</sub> | <i>C4A</i> copy number |         | <i>C4B</i> copy number |         | <i>n</i> <sub>patients</sub> | <i>n</i> <sub>controls</sub> |
|-----------------|-----------------------|---------|------------------------------|------------------------------|------------------------|---------|------------------------|---------|------------------------------|------------------------------|
|                 | OR                    | p-value |                              |                              | OR                     | p-value | OR                     | p-value |                              |                              |
| <b>SLE</b>      | 1.83                  | 1e-20   | 934                          | 1251                         | 2.03                   | 1e-25   | 1.17                   | 0.10    | 913                          | 1251                         |
| <b>pSS</b>      | 2.17                  | 1e-28   | 905                          | 1251                         | 2.36                   | 5e-33   | 1.33                   | 6e-03   | 905                          | 1251                         |
| <b>Myositis</b> | 2.15                  | 4e-18   | 451                          | 1251                         | 2.28                   | 6e-20   | 1.56                   | 5e-04   | 451                          | 1251                         |

**B**

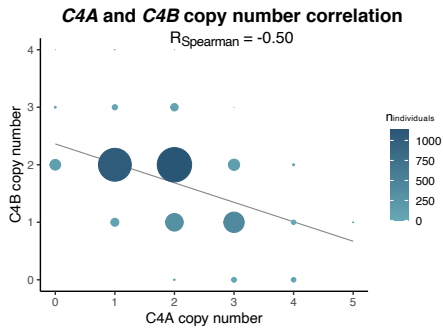

## Supplementary Figure 1 Association of *C4* copy number to three systemic inflammatory autoimmune diseases

**A** Association between each decrease in *C4* copy number and SLE, pSS and myositis as compared to healthy controls, analysed by logistic regression. Copy number of *C4A* and *C4B* were included together in additive models, whereas *C4* copy number was analysed alone. All models were adjusted for sex and PC1-PC4.

**B** Spearman correlation between *C4A* copy number and *C4B* copy number for patients ( $n_{\text{SLE}} = 913$ ,  $n_{\text{pSS}} = 905$ ,  $n_{\text{myositis}} = 451$ ) combined with healthy controls ( $n = 1,251$ ). Size of points indicate the number of individuals for each combination.

## Supplementary Figure 2

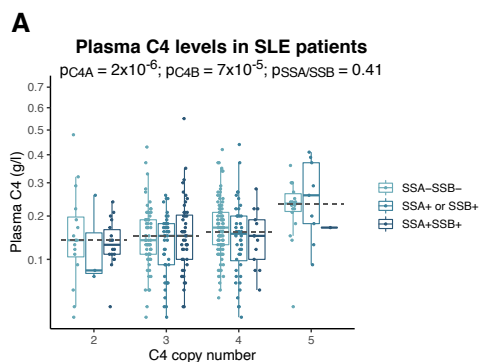

### Supplementary Figure 2 Plasma C4 level in SLE patients stratified for *C4* copy number and anti-SSA/SSB autoantibody status

**A** Plasma levels of C4 among SLE patients. Sqrt-transformed plasma C4 levels analysed by ANOVA and adjusted for sex, age at sampling and cohort ( $n = 411$ ). Note that copy numbers of *C4A* and *C4B* are included in the additive model, whereas plot shows total *C4* copy number for simplicity. Dashed line indicate median C4 concentration at each *C4* copy number level.

# Supplementary Figure 3

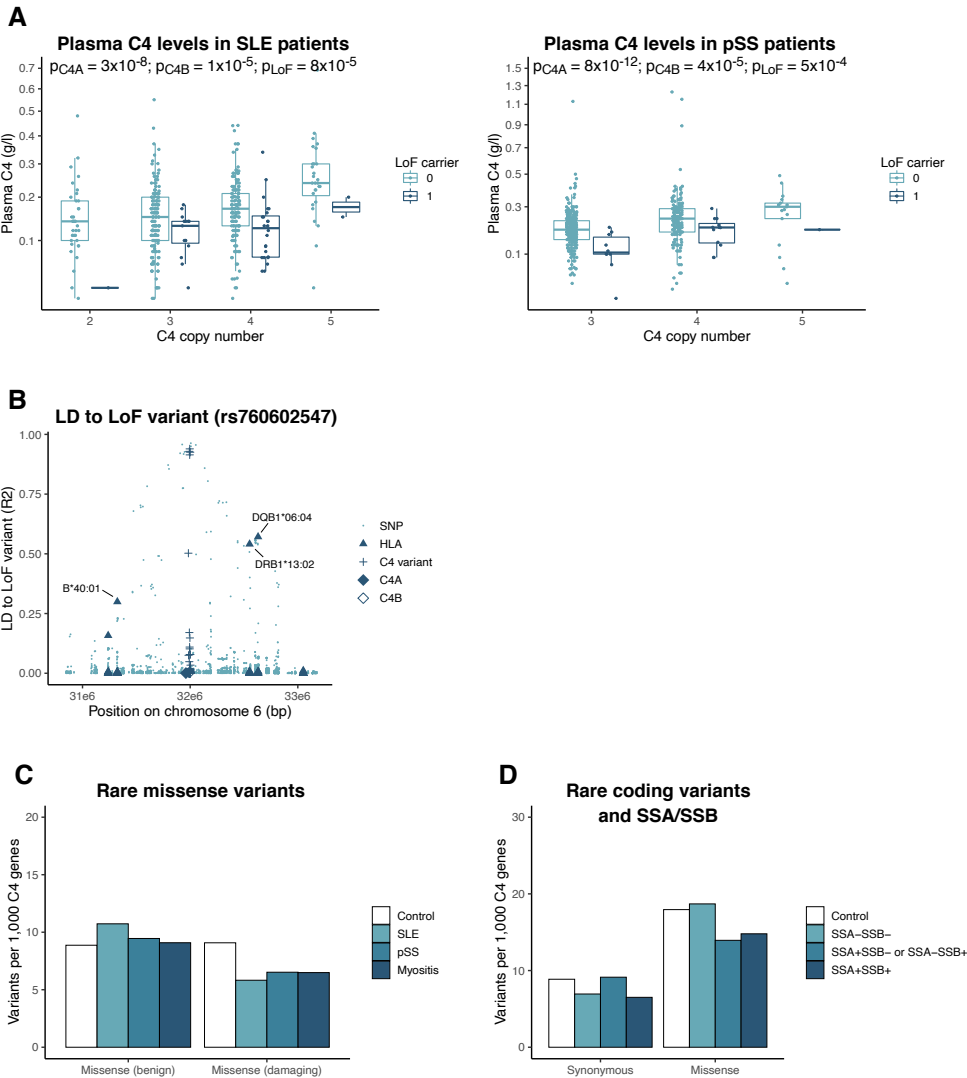

## Supplementary Figure 3 Plasma levels and LD plot of common LoF variant, and analysis of rare coding *C4* variants

**A** Plasma C4 levels for carriers (1) and non-carriers (0) of the LoF variant rs760602547 among SLE patients (left panel) and pSS patients (right panel), stratified for *C4* copy number. Sqrt-transformed plasma C4 levels were analysed by ANOVA and adjusted for sex, age at sampling (SLE patients only) and cohort ( $n_{SLE} = 407$ ;  $n_{pSS} = 471$ ). Note that copy numbers of *C4A* and *C4B* are included in the additive model, whereas plot shows total *C4* copy number for simplicity.

**B** LD ( $R^2$ ) between the loss-of-function (LoF) variant rs760602547 in *C4A* and *HLA* alleles, *C4* variants and SNPs in the *HLA* region.

**C** Number of *C4* genes carrying a rare (present among  $< 0.5\%$  of individuals) missense variant in each disease cohort. Effect of variants have been predicted using PolyPhen as benign ( $n_{variants} = 51$ ) or possibly/probably deleterious ( $n_{variants} = 49$ ). The number of variants in each disease group has been adjusted for total *C4* copy number in order to account for lower copy number of *C4* among patients with systemic inflammatory autoimmune diseases.

**D** Same as (C), but for SLE, pSS and myositis patients combined and grouped on anti-SSA/SSB status ( $n_{missense} = 100$ ,  $n_{synonymous} = 44$ ).

## Supplementary Figure 4

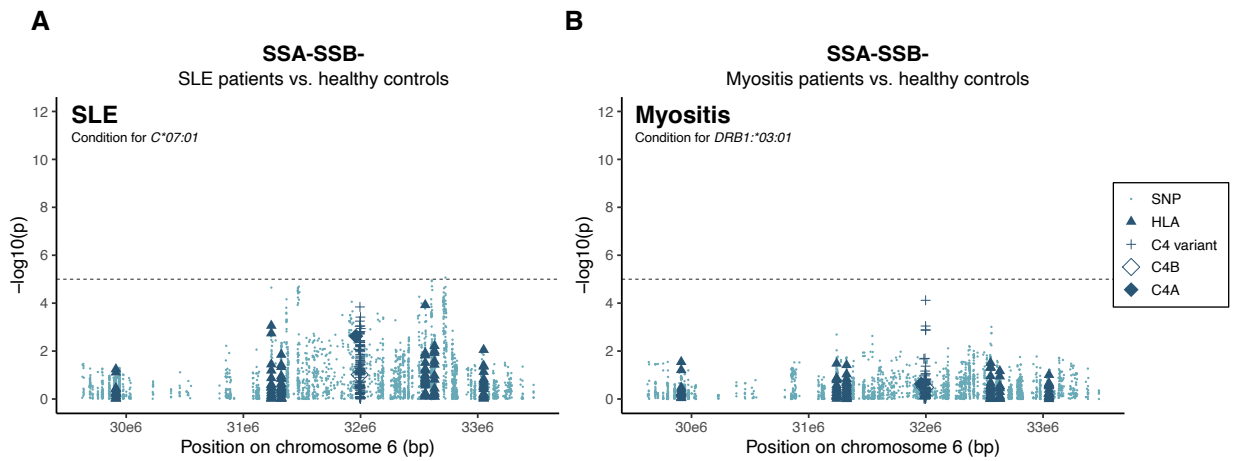

### Supplementary Figure 4 Conditional analysis of variants in *HLA* region for in anti-SSA/SSB-negative patients

**A** Conditional analysis of variants in *HLA* region to patients with SLE ( $n = 544$ ) without any autoantibodies against SSA/SSB as compared to healthy controls ( $n = 1,251$ ).

**B** Conditional analysis of variants in *HLA* region to patients with myositis ( $n = 247$ ) without any autoantibodies against SSA/SSB as compared to healthy controls ( $n = 1,251$ ).

(A and B) *HLA* alleles for 6 genes (from left: *HLA-A*, *-C*, *-B*, *-DRB1*, *-DQB1* and *-DPB1*), *C4A/C4B* copy number, and variants in *C4* present in more than 1% of individuals were included in the analysis. Analysed by logistic regression adjusted for sex and PC1-PC4. Dashed line represents Bonferroni-corrected significance threshold ( $p = 1 \times 10^{-5}$ ).

# Supplementary Figure 5

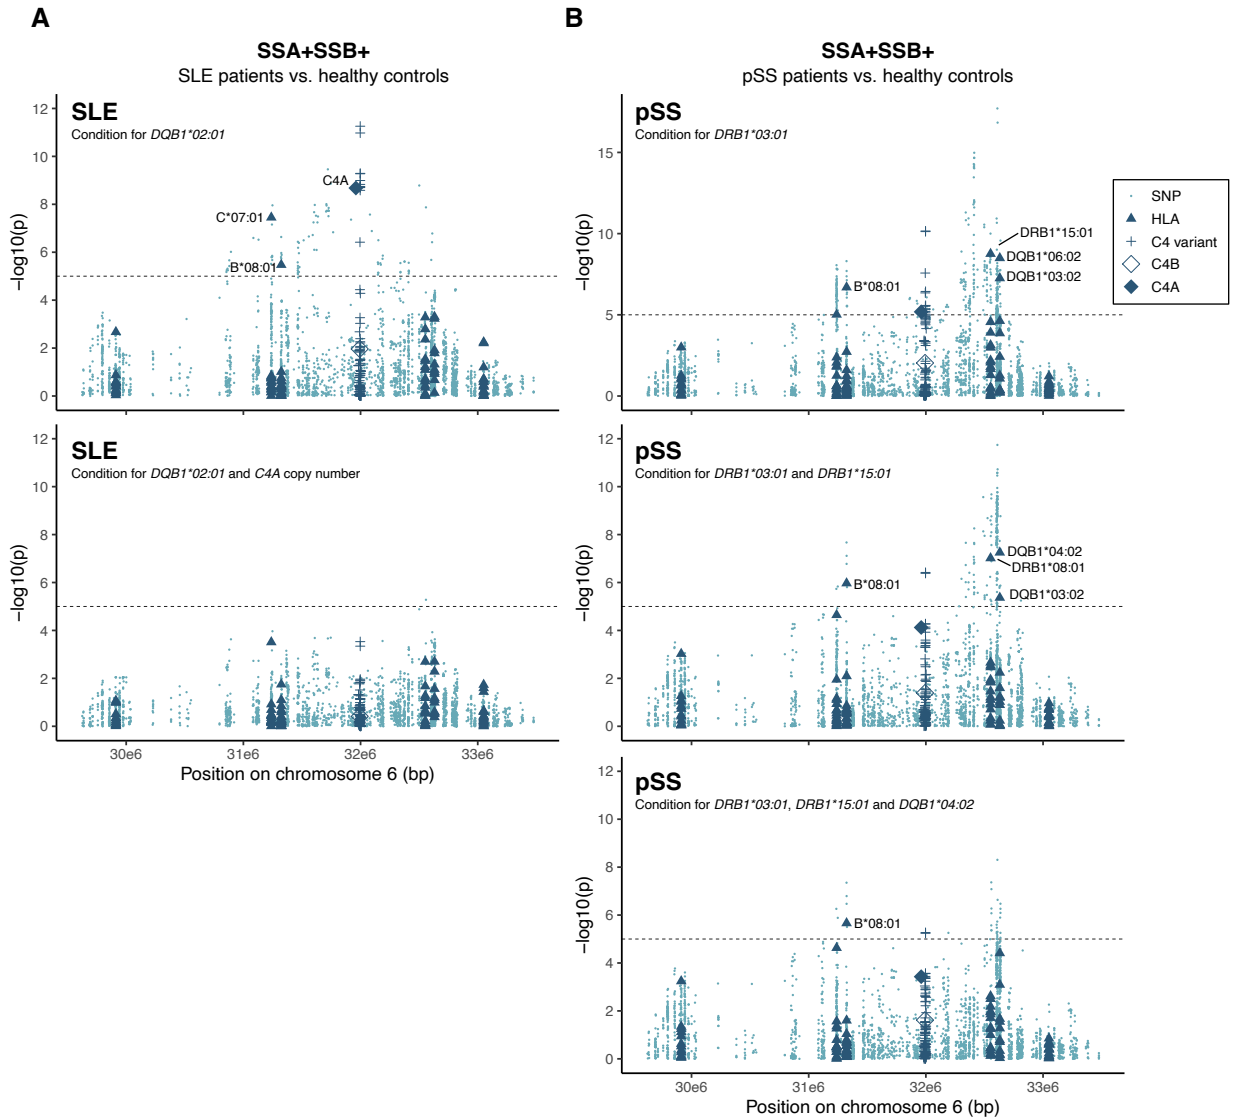

## Supplementary Figure 5 Conditional analysis of variants in *HLA* region for in anti-SSA/SSB-positive patients

**A** Conditional analysis of variants in *HLA* region in patients with SLE (n = 168) with autoantibodies against both SSA and SSB as compared to healthy controls (n = 1,251).

**B** Conditional analysis of variants in *HLA* region in patients with pSS (n = 368) with autoantibodies against both SSA and SSB as compared to healthy controls (n = 1,251).

(A and B) *HLA* alleles for 6 genes (from left: *HLA-A*, *-C*, *-B*, *-DRB1*, *-DQB1* and *-DPB1*), *C4A/C4B* copy number, and variants in *C4* present in more than 1% of individuals were included in the analysis. Analysed by logistic regression adjusted for sex and PC1-PC4. Dashed line represent Bonferroni-corrected significance threshold ( $p = 1 \times 10^{-5}$ ).

# Supplementary Figure 6 (continued on next page)

## SIAD (systemic inflammatory autoimmune disease)

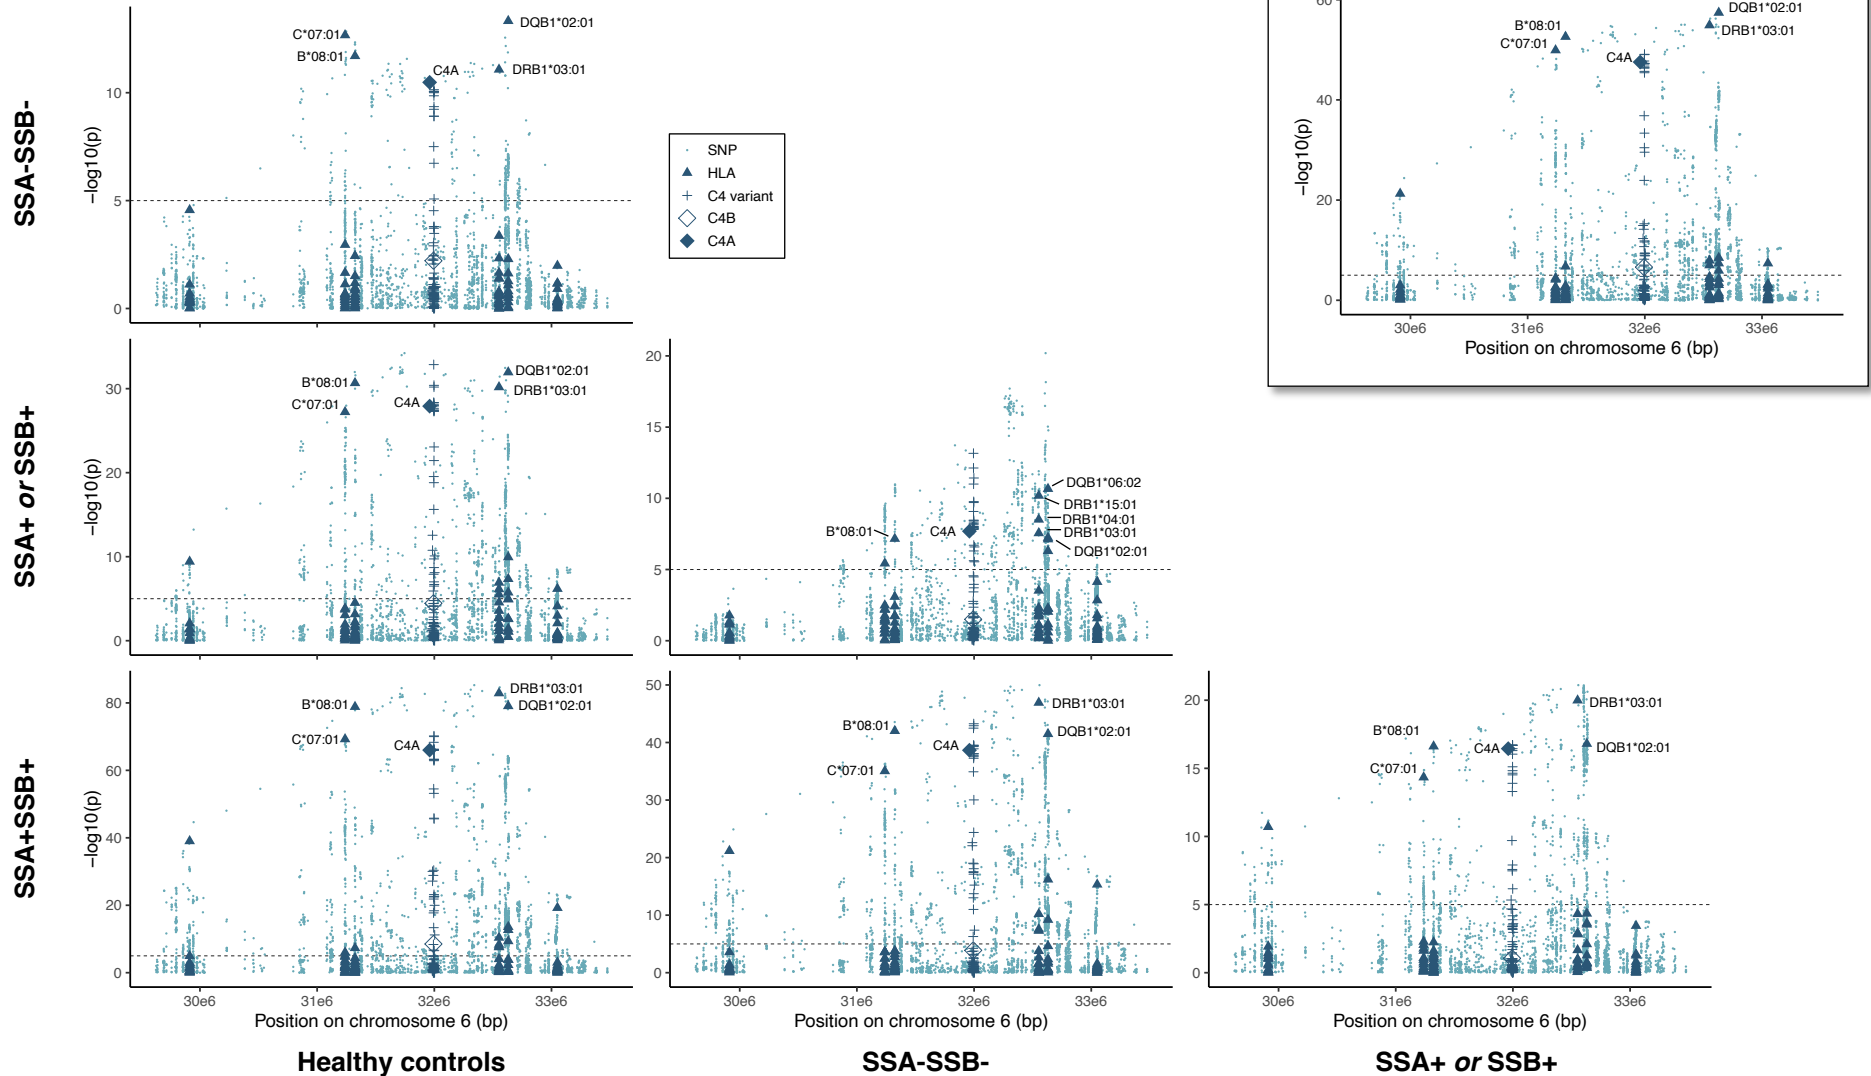

Supplementary Figure 6 (continued on next page) LocusZoom of *C4* copy number and *HLA* for SSA/SSB subgroups of SIAD patients and healthy controls

Association of *C4A/C4B* copy number, *C4* variants, *HLA* alleles and SNPs present among > 1% of individuals, subgrouping patients on anti-SSA/SSB autoantibody status.

*HLA* alleles for 6 genes (from left: *HLA-A*, *-C*, *-B*, *-DRB1*, *-DQB1* and *-DPB1*), *C4A/C4B* copy number, and variants in *C4* present in more than 1% of individuals were included in the analysis.

Analysed by logistic regression, adjusting for sex and PC1-PC4. Dashed line represent Bonferroni-corrected significance threshold ( $p = 1e-5$ ).

$n_{SIAD} = 2,290$ ;  $n_{SSA+SSB+} = 547$ ;  $n_{SSA+ or SSB+} = 606$ ;  $n_{SSA-SSB-} = 1,032$ ;  $n_{HC} = 1,251$

# Supplementary Figure 6 (...continued...)

## SLE

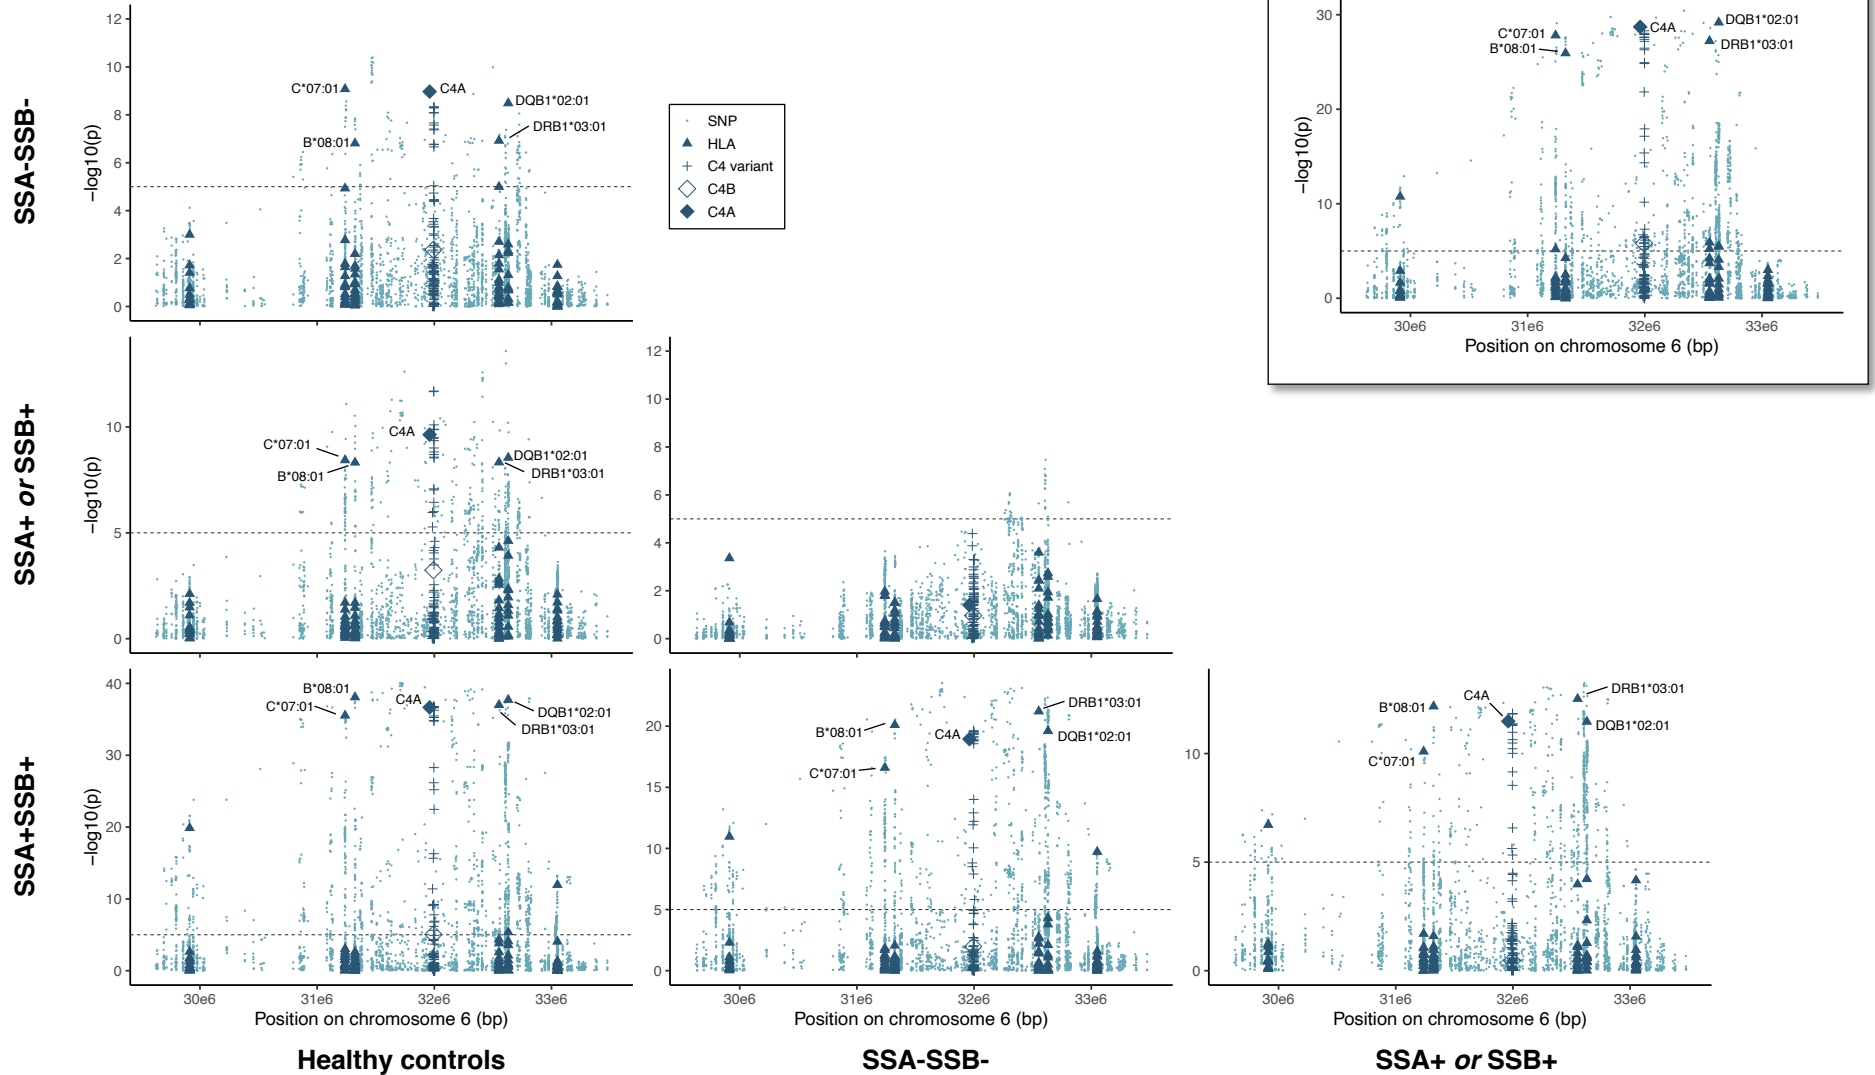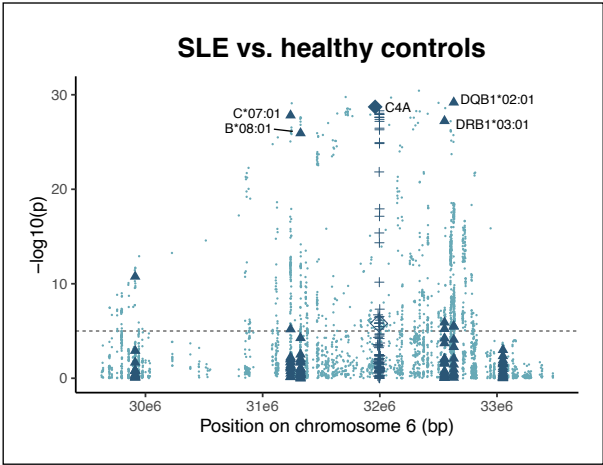

**Supplementary Figure 6 (...continued...) LocusZoom of *C4* copy number and *HLA* for SSA/SSB subgroups of SLE patients and healthy controls**

Association of *C4A/C4B* copy number, *C4* variants, *HLA* alleles and SNPs present among > 1% of individuals, subgrouping patients on anti-SSA/SSB autoantibody status.

*HLA* alleles for 6 genes (from left: *HLA-A*, *-C*, *-B*, *-DRB1*, *-DQB1* and *-DPB1*), *C4A/C4B* copy number, and variants in *C4* present in more than 1% of individuals were included in the analysis.

Analysed by logistic regression, adjusting for sex and PC1-PC4. Dashed line represent Bonferroni-corrected significance threshold ( $p = 1e-5$ ).

$n_{SLE} = 934$ ;  $n_{SSA+SSB+} = 168$ ;  $n_{SSA+ \text{ or } SSB+} = 207$ ;  $n_{SSA-SSB-} = 544$ ;  $n_{HC} = 1,251$ .





## Supplementary Figure 6 (...continued...)

### Myositis

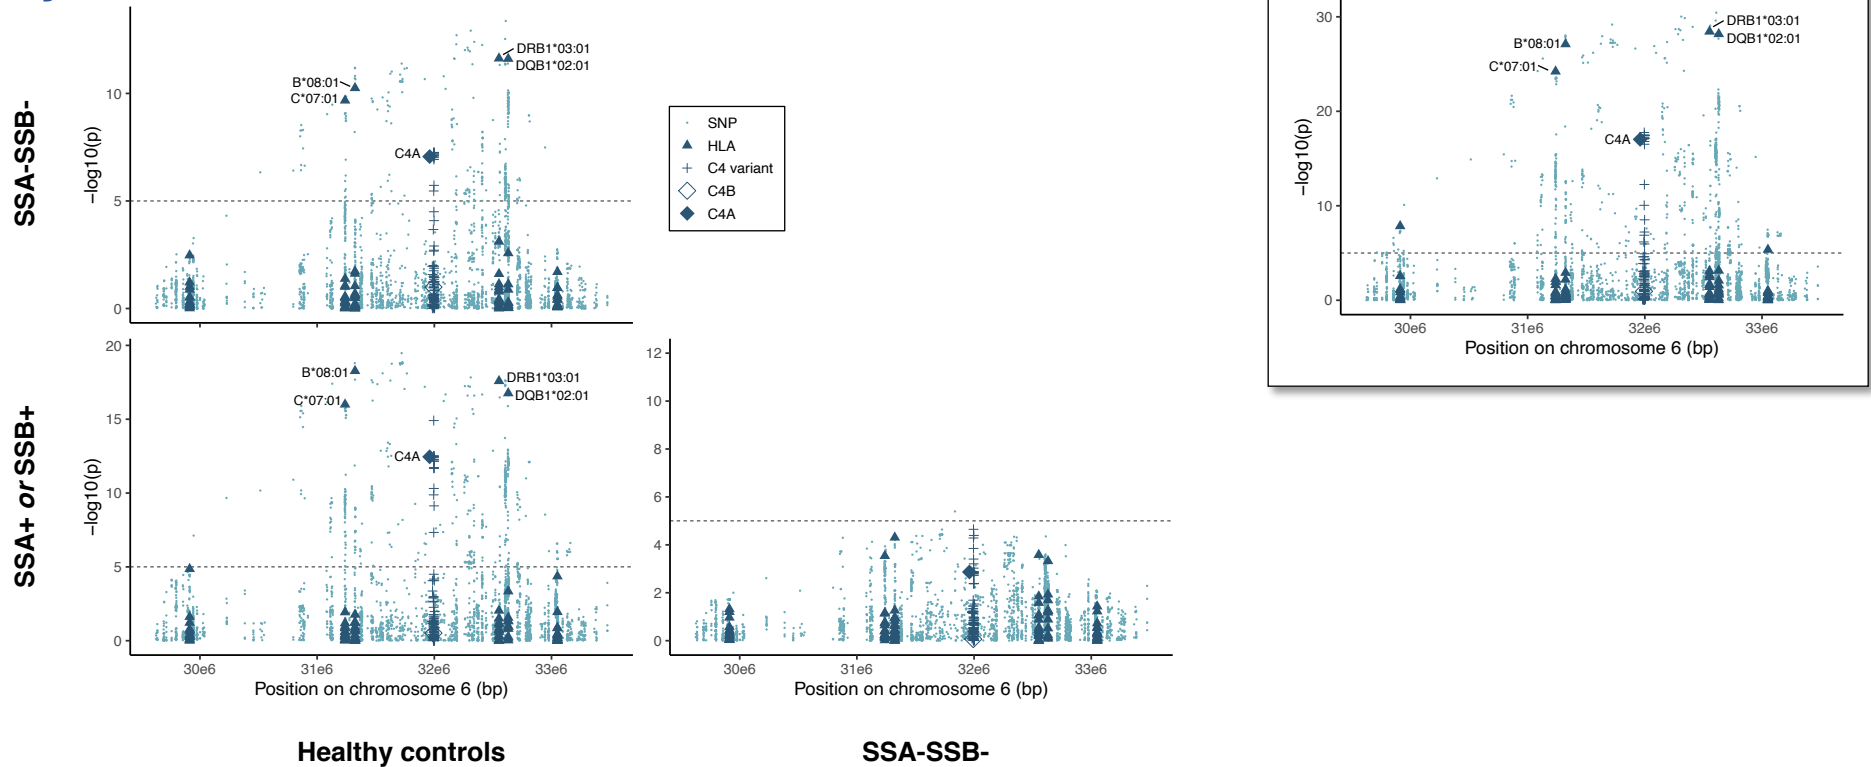

#### Supplementary Figure 6 (...continued...) LocusZoom of *C4* copy number and *HLA* for SSA/SSB subgroups of myositis patients and healthy controls

Association of *C4A/C4B* copy number, *C4* variants, *HLA* alleles and SNPs present among > 1% of individuals, subgrouping patients on anti-SSA/SSB autoantibody status.

*HLA* alleles for 6 genes (from left: *HLA-A*, *-C*, *-B*, *-DRB1*, *-DQB1* and *-DPB1*), *C4A/C4B* copy number, and variants in *C4* present in more than 1% of individuals were included in the analysis. Analysed by logistic regression, adjusting for sex and PC1-PC4. Dashed line represent Bonferroni-corrected significance threshold ( $p = 1e-5$ ).

$n_{\text{Myositis}} = 451$ ;  $n_{\text{SSA+SSB+}} = 11$ ;  $n_{\text{SSA+ or SSB+}} = 106$ ;  $n_{\text{SSA-SSB-}} = 247$ ;  $n_{\text{HC}} = 1,251$ . Due to few SSA+SSB+ myositis patients, no LocusZoom has been performed for this subgroup of patients.

# Supplementary Table 1

Supplementary Table 1 Basic characteristics of study participants

|                         | SLE        | pSS                     | Myositis                | Control                 |
|-------------------------|------------|-------------------------|-------------------------|-------------------------|
| n                       | 934        | 905                     | 451                     | 1,251                   |
| Females                 | 805 (86%)  | 844 (93%)               | 300 (67%)               | 1,079 (86%)             |
| Age at diagnosis        | 36 (3-85)  | 53 (14-90) <sup>a</sup> | 52 (12-82) <sup>b</sup> | -                       |
| Age at data abstraction | 52 (18-94) | 62 (19-92)              | 62 (24-87) <sup>c</sup> | -                       |
| Age                     | -          | -                       | -                       | 54 (19-88) <sup>d</sup> |

<sup>a</sup> Information missing for 1 individual

<sup>b</sup> Information missing for 256 individuals

<sup>c</sup> Information missing for 257 individuals

<sup>d</sup> Information missing for 182 individuals

## Supplementary Table 2

| Autoantibody              | SLE         |      |           |       |              | pSS         |      |           |       |              | Myositis    |      |           |       |              |
|---------------------------|-------------|------|-----------|-------|--------------|-------------|------|-----------|-------|--------------|-------------|------|-----------|-------|--------------|
|                           | Positive    | OR   | 95% CI    | p     | Padjusted    | Positive    | OR   | 95% CI    | p     | Padjusted    | Positive    | OR   | 95% CI    | p     | Padjusted    |
| Antinuclear antibodies    | 919 (98.4%) | 1.50 | 0.73-3.19 | 0.28  | 1.00         | 681 (75.6%) | 2.04 | 1.63-2.57 | 6e-10 | <b>6e-09</b> | 178 (52.0%) | 1.46 | 1.06-2.02 | 0.02  | 0.34         |
| SSA                       | 343 (37.3%) | 2.01 | 1.65-2.47 | 1e-11 | <b>1e-10</b> | 644 (71.2%) | 3.20 | 2.53-4.08 | 1e-21 | <b>1e-20</b> | 120 (32.4%) | 1.90 | 1.37-2.68 | 2e-04 | <b>3e-03</b> |
| - Ro52                    | 244 (30.2%) | 2.21 | 1.77-2.77 | 4e-12 | <b>5e-11</b> | 155 (54.4%) | 3.52 | 2.34-5.47 | 6e-09 | <b>6e-08</b> | 101 (28.5%) | 2.00 | 1.41-2.90 | 2e-04 | <b>3e-03</b> |
| - Ro60                    | 313 (38.7%) | 1.95 | 1.59-2.41 | 4e-10 | <b>4e-09</b> | 273 (60.0%) | 3.50 | 2.55-4.90 | 6e-14 | <b>6e-13</b> | 27 (7.8%)   | 1.54 | 0.87-2.84 | 0.15  | 1.00         |
| SSB                       | 200 (21.7%) | 3.39 | 2.63-4.43 | 4e-20 | <b>5e-19</b> | 388 (43.0%) | 2.39 | 1.94-2.97 | 1e-15 | <b>1e-14</b> | 11 (3.0%)   | 1.90 | 0.77-5.07 | 0.18  | 1.00         |
| RNP                       | 177 (25.3%) | 0.92 | 0.72-1.16 | 0.48  | 1.00         | 43 (5.5%)   | 0.96 | 0.62-1.52 | 0.87  | 1.00         | -           | -    | -         | -     | -            |
| dsDNA                     | 437 (62.0%) | 0.87 | 0.70-1.08 | 0.21  | 1.00         | 29 (3.6%)   | 1.30 | 0.76-2.26 | 0.35  | 1.00         | -           | -    | -         | -     | -            |
| Sm                        | 92 (13.0%)  | 1.04 | 0.77-1.41 | 0.79  | 1.00         | 9 (1.2%)    | 2.81 | 1.00-8.71 | 0.06  | 0.55         | 1 (0.8%)    | NA   | NA        | NA    | NA           |
| Rheumatoid factor (RF)    | 125 (23.6%) | 1.64 | 1.24-2.17 | 6e-04 | <b>7e-03</b> | 297 (48.8%) | 1.81 | 1.42-2.33 | 2e-06 | <b>2e-05</b> | 10 (10.0%)  | 0.88 | 0.33-2.34 | 0.79  | 1.00         |
| Lupus anticoagulant (LAC) | 134 (22.6%) | 0.63 | 0.47-0.82 | 8e-04 | <b>1e-02</b> | -           | -    | -         | -     | -            | -           | -    | -         | -     | -            |
| Cardiolipin IgG           | 237 (26.0%) | 0.78 | 0.63-0.96 | 0.02  | 0.22         | -           | -    | -         | -     | -            | -           | -    | -         | -     | -            |
| Beta 2 glycoprotein 1 IgG | 175 (19.9%) | 0.72 | 0.56-0.91 | 6e-03 | 0.07         | -           | -    | -         | -     | -            | -           | -    | -         | -     | -            |
| Jo-1                      | -           | -    | -         | -     | -            | -           | -    | -         | -     | -            | 124 (27.7%) | 1.95 | 1.42-2.73 | 6e-05 | <b>9e-04</b> |
| U1RNP                     | -           | -    | -         | -     | -            | -           | -    | -         | -     | -            | 21 (5.7%)   | 1.13 | 0.59-2.21 | 0.72  | 1.00         |
| Mi-2                      | -           | -    | -         | -     | -            | -           | -    | -         | -     | -            | 10 (2.5%)   | 0.63 | 0.26-1.52 | 0.30  | 1.00         |
| PM/Scl                    | -           | -    | -         | -     | -            | -           | -    | -         | -     | -            | 28 (7.1%)   | 1.82 | 1.00-3.47 | 0.06  | 0.86         |
| MDA5                      | -           | -    | -         | -     | -            | -           | -    | -         | -     | -            | 12 (3.8%)   | 1.05 | 0.46-2.55 | 0.91  | 1.00         |
| SRP                       | -           | -    | -         | -     | -            | -           | -    | -         | -     | -            | 19 (4.5%)   | 1.24 | 0.63-2.52 | 0.55  | 1.00         |
| PL7                       | -           | -    | -         | -     | -            | -           | -    | -         | -     | -            | 10 (2.3%)   | 0.97 | 0.39-2.46 | 0.94  | 1.00         |
| PL12                      | -           | -    | -         | -     | -            | -           | -    | -         | -     | -            | 16 (3.7%)   | 2.62 | 1.21-6.06 | 0.02  | 0.28         |
| TIF1                      | -           | -    | -         | -     | -            | -           | -    | -         | -     | -            | 19 (7.5%)   | 0.89 | 0.45-1.84 | 0.75  | 1.00         |

### Supplementary Table 2 Association between autoantibody status and *C4A* copy number

Association between autoantibodies and each decrease in *C4A* copy number in case-case analysis of SLE, pSS and myositis, respectively. Analysed by logistic regression, adjusting for *C4B* copy number, sex and PC1-PC4. Bonferroni correction was used for adjustment of multiple testing for each disease.

Abbreviations: SLE systemic lupus erythematosus, pSS primary Sjögren's syndrome, OR odds ratio, CI confidence interval.
